# Supplementary material for: Land snail fauna in Gunung Kuang Limestone Hill, Perak, Malaysia and its conservation implications (Mollusca, Gastropoda)
Source: Zookeys. 2018 Jun 26;(769):1–11. doi: 10.3897/zookeys.769.25571 (PMC6030181; doi:10.3897/zookeys.769.25571)
Supplement: Supplementary material 1 — Species list and occurrences [file zookeys-769-001-s001.csv]

Species	Gunung Kuang. Plot 1.	Gunung Kuang. Plot 2.	Gunung Kuang. Plot 3.	Gunung Kuang. Plot 4.	Gunung Kuang. Plot 5.
Achatinidae
Achatina fulica (Bowdich, 1822)	1	0	0	0	0
Ariophantidae
Macrochlamys 'Bercham 1'	0	0	1	1	1
Macrochlamys 'Kuang 1'	0	1	0	1	0
Microcystina clarkae Maassen, 2000	0	0	1	1	1
Microcystina 'Kuang 1'	1	0	0	0	0
Microcystina 'Kuang 2'	1	0	0	0	0
Microcystina 'Kuang 3'	1	0	0	0	0
Microcystina sinica Von Moellendorff, 1885	1	0	0	0	1
Microcystina townsendiana Godwin Austen & Nevill, 1879	0	0	1	0	0
Assimineidae
Acmella 'Kanthan 1'	1	0	0	0	0
Bradybaenidae
Bradybaena similaris (F�russac, 1821)	0	0	0	1	0
Camaenidae
Chloritis breviseta (Pfeiffer, 1862)	1	0	0	0	0
Charopidae
Charopa lafargei Vermeulen & Marzuki, 2014	0	0	1	0	0
Charopa 'Kanthan 1'	1	0	0	0	0
Clausiliidae
Phaedusa filicostata kapayanensis (de Morgan, 1885)	0	0	0	1	0
Cyclophoridae
Alycaeus kapayanesis (De Morgan, 1885)	1	1	0	0	0
Chamalycaeus diplochilus (von Moellendorff, 1886)	1	0	1	0	1
Cyclophorus malayanus (Benson, 1852)	1	0	0	0	0
Cyclophorus semisulcatus (Sowerby, 1843)	1	0	0	0	0
Platyraphe lowi (De Morgan, 1885)	1	1	0	0	1
Rhiostoma jousseaumei de Morgan, 1885	1	1	1	1	0
Diapheridae
Sinoennea subcylindrica (von Moellendorff, 1891)	1	0	0	0	1
Diplommatinidae
Diplommatina cf diminuta	0	1	1	0	0
Diplommatina crosseana Godwin-Austen & Nevill, 1879	1	1	0	0	0
Diplommatina nevilli Crosse, 1879	1	1	1	0	1
Diplommatina superba superba Godwin Austen & Nevill, 1879	0	1	1	0	0
Diplommatina ventriculus (V. Moellendorff, 1891)	0	0	1	0	0
Opisthostoma paulucciae (Crosse & Nevill, 1879)	0	0	0	0	1
Dyakiidae
Pseudoplecta bijuga (Stoliczka, 1873)	1	0	0	0	0
Quantula striata (Gray, 1834)	0	1	0	0	0
Endodontidae
Philalanka pusilla Maassen, 2000	1	0	0	0	0
Euconulidae
Kaliella 'kuang 1'	0	0	1	0	0
Kaliella barrakporensis (Pfeiffer, 1852)	1	0	0	0	1
Kaliella doliolum (Pfeiffer, 1846)	0	0	1	1	0
Kaliella microconus (Mousson, 1865)	1	1	0	1	1
Kaliella scandens (Cox, 1872)	1	0	0	1	0
Ferussaciidae
Cecilioides caledonica (Crosse, 1867)	1	0	1	1	0
Hydrocenidae
Georissa monterosatiana Godwin Austen & Nevill, 1879	1	1	1	1	0
Georissa semisculpta Godwin Austen & Nevill, 1879	1	1	0	0	0
Pupinidae
Pupina tchehelensis de Morgan, 1885	0	1	1	1	1
Streptaxidae
Discartemon plussensis (de Morgan, 1885)	0	1	0	1	0
Gulella bicolor (Hutton, 1834)	0	1	1	0	0
Subulinidae
Allopeas clavulinum (Potiez & Michaud, 1838)	0	1	0	0	1
Allopeas gracile (Hutton, 1834)	0	1	0	0	0
Prosopeas tchehelense (De Morgan, 1885)	1	0	0	0	0
Vertiginidae
Gyliotrachela hungerfordiana (V. Moellendorff, 1886)	1	1	0	0	0
Ptychopatula orcula (Benson, 1850)	1	0	1	0	1
